# Supplementary material
Source: MDPI journal article supplement (https://www.mdpi.com/2076-3271/8/3/39)
Supplement: s1 [file s1]

**Search strategy for OVID MEDLINE database.**

| Step | Search Term                                                                                 |
|------|---------------------------------------------------------------------------------------------|
| 1    | Inflammatory bowel diseases OR Crohn's disease OR Ulcerative colitis                        |
| 2    | Graft failure OR graft loss OR graft survival OR mortality OR death OR remission OR outcome |
| 3    | Kidney transplant OR renal transplant                                                       |
| 4    | 1 AND 2 AND 3                                                                               |

Search results: 200

**Search strategy for EMBASE database.**

('inflammatory bowel disease' OR 'Crohn disease' OR 'ulcerative colitis') AND ('kidney transplant' OR 'renal transplant' OR 'kidney transplantation' OR 'kidney graft' OR 'kidney graft rejection' OR 'patient history of kidney transplantation')

Search results: 627

**Search strategy for Cochrane Library**

('Inflammatory bowel diseases' OR 'Crohn's disease' OR 'Ulcerative colitis') AND ('Graft failure' OR 'graft loss' OR 'graft survival' OR 'mortality' OR 'death' OR 'remission' OR 'outcome') AND ('Kidney transplant' OR 'renal transplant')

Search results: 14

**Figure S1.** Risk of bias summary.

|                 | Representativeness of the exposed cohort | Ascertainment of exposure | Demonstration of outcome of interest was not present at start of study | Assessment of outcome | Was follow-up long enough for outcomes to occur | Adequate follow-up duration |
|-----------------|------------------------------------------|---------------------------|------------------------------------------------------------------------|-----------------------|-------------------------------------------------|-----------------------------|
| Dobles 2016     | +                                        | +                         | +                                                                      | +                     | +                                               | +                           |
| Founler 2013    | +                                        | +                         | +                                                                      | +                     | +                                               | +                           |
| Garrouste 2016  | +                                        | +                         | +                                                                      |                       | +                                               | +                           |
| Grupper 2019    | +                                        | +                         | +                                                                      | +                     | +                                               | +                           |
| Kochhar 2016    | +                                        | +                         | +                                                                      | +                     | +                                               | +                           |
| Pittman 2017    | +                                        | +                         | +                                                                      | +                     |                                                 | +                           |
| Schnitzler 2015 | +                                        | +                         | +                                                                      | +                     | +                                               | +                           |

## Main results for Model 1, Random effects (MM), Z-Distribution, Logit event rate

| Covariate | Coefficient | Standard Error | 95% Lower | 95% Upper | Z-value | 2-sided P-value |
|-----------|-------------|----------------|-----------|-----------|---------|-----------------|
| Intercept | 0.2544      | 1.4027         | -2.4949   | 3.0036    | 0.18    | 0.8561          |
| Age       | -0.0336     | 0.0307         | -0.0937   | 0.0266    | -1.09   | 0.2739          |

### Statistics for Model 1

**Test of the model: Simultaneous test that all coefficients (excluding intercept) are zero**

Q = 1.20, df = 1, p = 0.2739

**Goodness of fit: Test that unexplained variance is zero**

$\tau^2 = 0.0868$ ,  $\tau = 0.2946$ ,  $I^2 = 28.53\%$ , Q = 7.00, df = 5, p = 0.2209

### Comparison of Model 1 with the null model

**Total between-study variance (intercept only)**

$\tau^2 = 0.1098$ ,  $\tau = 0.3313$ ,  $I^2 = 34.57\%$ , Q = 9.17, df = 6, p = 0.1642

**Proportion of total between-study variance explained by Model 1**

R<sup>2</sup> analog = 0.21

Number of studies in the analysis 7

## Main results for Model 1, Random effects (MM), Z-Distribution, Logit event rate

| Covariate | Coefficient | Standard Error | 95% Lower | 95% Upper | Z-value | 2-sided P-value |
|-----------|-------------|----------------|-----------|-----------|---------|-----------------|
| Intercept | -0.7514     | 0.5665         | -1.8617   | 0.3588    | -1.33   | 0.1847          |
| Male      | -1.1142     | 1.1425         | -3.3534   | 1.1250    | -0.98   | 0.3294          |

### Statistics for Model 1

**Test of the model: Simultaneous test that all coefficients (excluding intercept) are zero**

Q = 0.95, df = 1, p = 0.3294

**Goodness of fit: Test that unexplained variance is zero**

$\tau^2 = 0.0926$ ,  $\tau = 0.3043$ ,  $I^2 = 30.05\%$ , Q = 7.15, df = 5, p = 0.2099

### Comparison of Model 1 with the null model

**Total between-study variance (intercept only)**

$\tau^2 = 0.1098$ ,  $\tau = 0.3313$ ,  $I^2 = 34.57\%$ , Q = 9.17, df = 6, p = 0.1642

**Proportion of total between-study variance explained by Model 1**

R<sup>2</sup> analog = 0.16

Number of studies in the analysis 7

## Main results for Model 1, Random effects (MM), Z-Distribution, Logit event rate

| Covariate | Coefficient | Standard Error | 95% Lower | 95% Upper | Z-value | 2-sided P-value |
|-----------|-------------|----------------|-----------|-----------|---------|-----------------|
| Intercept | -0.1107     | 0.8499         | -1.7764   | 1.5550    | -0.13   | 0.8963          |
| Follow-up | -0.0170     | 0.0104         | -0.0373   | 0.0033    | -1.64   | 0.1010          |

### Statistics for Model 1

**Test of the model: Simultaneous test that all coefficients (excluding intercept) are zero**

$Q = 2.69$ ,  $df = 1$ ,  $p = 0.1010$

**Goodness of fit: Test that unexplained variance is zero**

$\tau^2 = 0.0600$ ,  $\tau = 0.2449$ ,  $I^2 = 16.70\%$ ,  $Q = 3.60$ ,  $df = 3$ ,  $p = 0.3079$

### Comparison of Model 1 with the null model

**Total between-study variance (intercept only)**

$\tau^2 = 0.1946$ ,  $\tau = 0.4411$ ,  $I^2 = 43.02\%$ ,  $Q = 7.02$ ,  $df = 4$ ,  $p = 0.1348$

**Proportion of total between-study variance explained by Model 1**

$R^2$  analog = 0.69

**Number of studies in the analysis** 5
